# Supplementary material for: Tumor Characteristics Associated with Benefit from Pembrolizumab in Advanced Non–Small Cell Lung Cancer
Source: Oxford University Press journal article supplement (doi:10.1158/1078-0432.ccr-18-4275), 2019-05-21
Supplement: 10780432ccr184275-sup-214524_2_supp_5532900_prt0rd.docx [file 10780432ccr184275-sup-214524_2_supp_5532900_prt0rd.docx]

**Supplemental Tables**

**Supplemental Table 1.** Association of the four correlative parameters and with other clinical characteristics.

**Supplemental Table 2.** Correlation ofpatient characteristics and ORR per irRC (PR vs SD/PD).

**Supplemental Table 3.** Patient characteristics (as continuous variables) in the correlative cohort per prior lines of therapy.

**Supplemental Table 4.** PFS and OS of correlative characteristics (as categorical variables) by year.

**Supplemental Table 5.** Characteristics as continuous variables of long term benefiters (Overall survival > 3 years with no intervening therapies) vs all other patients in the correlative cohort.
